# Supplementary material for: Recasting the Iron Rice Bowl: The Reform of China's State-Owned Enterprises
Source: Oxford University Press journal article supplement (doi:10.1162/rest_a_00637), 2016-08-24
Supplement: rest_a_00637-esupp.pdf [file rest_a_00637-esupp.pdf]

Online Appendix  
Recasting the Iron Rice Bowl:  
The Reform of China's State Owned Enterprises

Daniel Berkowitz\*, Hong Ma<sup>†</sup> and Shuichiro Nishioka<sup>‡</sup>

May 17, 2016

**Abstract**

Following the enactment of reforms in the mid-1990s China's state owned enterprises (SOEs) became more profitable. Using theoretical insights from Azmat, Manning and Van Reenen (2012) and Karabarbounis and Neiman (2014) and econometric methods in De Loecker and Warzynski (2012) this paper finds that SOE restructuring was nevertheless limited. This is because SOE profitability gains in part reflect that they were under less political pressure to hire excess labor and also their cost of capital fell and their capital-labor elasticity of substitution generally exceeded unity. Moreover, SOE productivity lagged foreign and private firms.

**EconLit Subject Descriptors:** E25, P23, P26

---

\*Department of Economics, University of Pittsburgh, 4711 WW Posvar Hall Pittsburgh PA 15216, Tel: +1(412) 648-7072, Email: dmberk@pitt.edu (corresponding author)

<sup>†</sup>Department of Economics, Tsinghua University, Beijing, China, 100084, Tel: +86(010) 6279-4388, Email: ma-hong@sem.tsinghua.edu.cn

<sup>‡</sup>Department of Economics, West Virginia University, 1601 University Avenue Morgantown WV 26506-0625, Tel: +1(304) 293-7875, Email: shuichiro.nishioka@mail.wvu.edu

## Appendix 1: Real Capital Stock

A real capital stock series is constructed using the perpetual inventory method as described in Brandt et al (2012). We have the book value of firms' fixed capital stock at the original purchase prices. Since these book values are the sum of nominal values for different years, they cannot be used directly. Thus, we construct a real capital stock series using the following formula:

$$K_{it} = (1 - \delta) K_{i,t-1} + (BK_{it} - BK_{i,t-1})/P_t \quad (1)$$

where  $BK_{it}$  is the book value of the capital stock for firm  $i$  in year  $t$ ; and  $P_t$  is the investment deflator as constructed by Brandt and Rawski (2008). To construct the real capital stock series, we then need to know the initial nominal value of the capital stock, which is projected as

$$BK_{i,t_0} = BK_{i,t_1} / (1 + g_{ps})^{t_1 - t_0}$$

where  $BK_{i,t_1}$  is the book value of capital stock when firm  $i$  first appears in the data set in year  $t_1$ , and,  $g_{ps}$  is the average growth rate of capital, calculated using province-sector level capital growth rate between the earliest available survey (1995) and the first year that the firm enters the data.<sup>1</sup> For firms founded later than 1998, the initial book value of capital stock is taken directly from the data set.

Using information on the age of firm  $i$ , we could get the projected book value of the capital stock for the beginning year  $t_0$  ( $BK_{i,t_0}$ ), which can be thought of as the initial nominal value of capital. In this case, the real capital stock is  $K_{i,t_0} = BK_{i,t_0}/P_{t_0}$ . We could also compute the real capital stock in each year, assuming an annual depreciation rate as 0.09 and using the perpetual inventory method as in equation (1).<sup>2</sup> Our estimated real capital series is highly correlated with the original value of nominal capital as well as the net value of nominal capital.

---

<sup>1</sup>To be more concrete, we use 1995 industrial census and calculate the province-sector level growth rate for the book value of capital. Note that Brandt et al (2012) use the province-sector level aggregate capital stock growth, which ignores entry and exit. We instead use the province-sector level average capital stock growth.

<sup>2</sup>We also use an alternative depreciation rate of 0.05 and find that our results are qualitatively similar.

## Appendix 2: Summary Statistics

Table A.1 contains summary statistics for our entire and balanced samples of firms aggregated by ownership. We keep a firm-year observations if all the data for gross output, intermediate inputs, real capital, employees, and labor shares (wage divided by value added) are available. To eliminate outliers, we drop the firms in the bottom and the top 0.25% of the distribution of values for labor shares and capital intensities and in the bottom and the top 0.1% of the distribution of values for intermediate input spending divided by gross output. As a result, we have 1,704,372 observations, which is an unbalanced panel of 457,610 manufacturing firms over ten years (1998 to 2007). We have excluded SOEs in the service sector. Tang et al (2014) document that SOEs tend to dominate upstream service sectors such as banking, insurance and telecommunications as well as mining (which we have also excluded); moreover, Li et al (2015) argue that this industrial structure has enabled upstream SOEs to extract high markups from competitive downstream firms and be profitable. If we were to include these upstream we might observe that markups are increasing for SOEs. Thus, because we have excluded mining and services, our analysis might underestimate the contribution of markups to the overall growth of SOE profitability.

Table A.2 reports several key aggregate production and income variables for top central SOEs and all other SOEs, and also for all SOEs. Table A.2 shows that the overall number of SOEs declines from 35,793 in 1998 to 11,787 in 2007. This decline is driven by all other SOEs because there is an increase in the number of top central SOEs. Employment in top central and other SOEs fell by 21.5% and 66.5%, respectively. During 1998-2007, the growth rate of capital intensity for other SOEs is much more rapid than the rate within top central SOEs although there was a persistent difference in their capital intensities even in 2007 (i.e., 3.0 for top central SOEs versus 1.8 for other SOEs). Table A.2 also reports the profit share of value added. During 1998-2007, the share of profits increased by 15.7% for top central SOEs and 19.8% for other SOEs. These results are robust when we use the balanced sample.

## Appendix 3: Robustness Checks for Production Functions

The traditional micro-econometric methods for estimating the capital-labor elasticity of substitution production include Kmenta (1967), non-linear least squares (e.g., Henningsen and Henningsen,

2012) and Chirinko et al (2011). While the approach of Kmenta (1967) uses the polynomial approximation of Taylor’s theorem, Chirinko et al (2011) use the first order condition of a CES production function in order to estimate the long-run capital-labor elasticity of substitution. The Chirinko et al method is not suitable for the case of Chinese manufacturing during 1998-2007: this is a period of rapid structural change and the Chirinko et al method requires a stable (stationary) time series of firm-level production variables. Moreover, the Chirinko et al method requires rich firm-level data on the cost of capital that we do not have.

Before we introduce the method that we have adapted from De Loecker and Warzynski (2012), we will discuss two traditional micro-econometric approaches for estimating the elasticity of substitution between labor and capital.

### **Kmenta’s Approach**

Kmenta (1967) uses the polynomial approximation of Taylor’s theorem around the Cobb-Douglas production function ( $\sigma_s = 1$ ):

$$\begin{aligned}
 q_{it} = & \ln(\omega_{it}) + \beta_s^n n_{it} + \beta_s^k k_{it} + \beta_s^{kn} n_{it}^2 + \beta_s^{kn} k_{it}^2 \\
 & - 2\beta_s^{kn} n_{it} k_{it} + (1 - \beta_s^n - \beta_s^k) m_{it}.
 \end{aligned} \tag{2}$$

where lower-case letters denote logged values:  $q_{it} = \ln(Q_{it})$ ,  $n_{it} = \ln(N_{it})$ ,  $k_{it} = \ln(K_{it})$ , and  $m_{it} = \ln(M_{it})$ .

Here, we can obtain the capital-labor elasticity of substitution from

$$\sigma_s = \left[ 1 + \beta_s^{kn} (\beta_s^n + \beta_s^k) / (\beta_s^n \beta_s^k) \right]^{-1}. \tag{3}$$

A standard method for estimating equation (2) is to assume there is no systematic productivity innovation: ( $\ln(\omega_{it}) = \ln(\omega_i)$ ), and estimate it with firm-fixed effects using the within-firm transformation:

$$\begin{aligned}
d(q_{it}) &= \beta_s^n d(n_{it}) + \beta_s^k d(k_{it}) + \beta_s^{kn} d(n_{it}^2) + \beta_s^{kn} d(k_{it}^2) \\
&\quad - 2\beta_s^{kn} d(n_{it}k_{it}) + (1 - \beta_s^n - \beta_s^k)d(m_{it}) + \sum_t \theta^t D_{it}^t + \varepsilon_{it}
\end{aligned} \tag{4}$$

where  $d(x_{it}) = x_{it} - (1/T_i) \sum_t x_{it}$  and  $T_i$  is the number of observations available for firm  $i$ .

Olley and Pakes (1996) and Akerberg et al (2015) criticize the within-transformation models, and that is why we use the De Loecker and Warzynski (2012) approach in the main body of our paper. Regarding the estimation of the capital-labor elasticity of substitution, Thursby and Lowell (1978) also show that the Kmenta (1967) approach becomes increasingly inaccurate as the absolute value of the actual elasticity of substitution gets larger. Nevertheless, as a robustness check the first and second panels in Table A.3 summarize the estimated parameters for the production function in equation (4) for each of 28 2-digit and 132 3-digit sectors<sup>3</sup> using the data from the entire sample. The capital-labor elasticity of substitution obtained from equation (3) exceeds unity in 92.9% of the 2-digit sectors and 82.6% of the 3-digit sectors.

## Non-Linear Least Squares

The parameters of the production function could be estimated by non-linear least squares. However, a challenging issue with this method is to achieve convergence (Henningsen and Henningsen, 2012). Thus, it is important to obtain good initial parameter values and to impose reasonable constraints on parameters so that the CES production function is as close to long-linear as possible. Regarding initial parameter values, we use the following values  $(\bar{a}_s, \bar{\sigma}_s, \bar{\alpha}_s) = (0.5, 1.25, 0.2)$ , which are close to the average values estimated from equation (4). Regarding the constraints on parameters in the production function specification, we make the most of enforcing the unit elasticity of substitution between the factor inputs and intermediate inputs and constant returns to scale in production. By assuming  $\ln(\omega_{it}) = \ln(\omega_i)$ , we can also estimate using non-linear least squares with the within-firm transformation:

---

<sup>3</sup>The estimations do not converge to the reasonable ranges for four of the 3-digit sectors.

$$\begin{aligned}
d(q_{it}) &= \alpha_s \frac{\sigma_s}{\sigma_s - 1} \ln \left( a_s (N_{it})^{\frac{\sigma_s - 1}{\sigma_s}} + (1 - a_s) (K_{it})^{\frac{\sigma_s - 1}{\sigma_s}} \right) \\
&\quad - \alpha_s \frac{\sigma_s}{\sigma_s - 1} \ln \left( a_s (\tilde{N}_{it})^{\frac{\sigma_s - 1}{\sigma_s}} + (1 - a_s) (\tilde{K}_{it})^{\frac{\sigma_s - 1}{\sigma_s}} \right) \\
&\quad + (1 - \alpha_s) d(m_{it}) + \sum_t \theta^t D_{it}^t + \varepsilon_{it}
\end{aligned} \tag{5}$$

where  $\tilde{X}_i = (1/T_i) \sum_t X_{it}$ .

The third and fourth panels in Table A.3 report the estimated parameters in equation (5) for each of the 27 2-digit and each of the 114 3-digit sectors.<sup>4</sup> The elasticity of substitution between labor and capital ( $\sigma_s$ ) exceeds unity in 96.3% of 2-digit sectors and 94.7% of 3-digit sectors, indicating that labor and capital are strong substitutes in Chinese manufacturing during 1998-2007.

## Robustness Checks

### Human Capital Adjustments

Assuming that an individual's wage depends on her/his labor productivity, our measure of labor reflects the regional differences in human capital accumulation. We also adjust the national-level growth of human capital over the period using the Penn World Table 8.1. (Feenstra et al, 2015). Instead of using the reported number of head-count employee ( $L_{it}$ ), in this paper we develop the measure of labor from the following equation:

$$N_{it} = L_{it} \times \left( 100 \times \frac{w_{rt}}{w_t} \times \frac{hc_t}{hc_0} \right) \tag{6}$$

where  $w_{rt}$  is the average wage at year  $t$  for one of the four regions<sup>5</sup> in China ( $r$ ),<sup>6</sup>  $w_t$  is the average wage at year  $t$  in China, and  $hc_t$  is the measure of human capital for year  $t$  (and  $t = 0$  for the initial year of 1998) from the Penn World Table 8.1.

<sup>4</sup>The estimations do not converge to the reasonable ranges for one of the 2-digit sectors and 22 of the 3-digit sectors.

<sup>5</sup>Each region includes the following provinces or province-equivalent municipal cities: the North includes Beijing, Tianjin, Hebei, Shanxi, Neimenggu, Liaoning, Jilin and Heilongjiang; the East includes Shanghai, Jiangsu, Zhejiang, Anhui, Fujian, Jiangxi and Shandong; the South includes Henan, Hubei, Hunan, Guangdong, Guangxi and Hainan; and, the West includes Chongqing, Sichuan, Guizhou, Yunnan, Xizang, Shan'xi, Gansu, Qinghai, Ningxia and Xinjiang.

<sup>6</sup>See Cheng et al (2013) for the regional differences in factor markets within China.

This adjustment is important in estimating the elasticity of substitution since we do not include labor- and capital-augmenting productivities in our production function. Alternatively, we obtain the second measure of labor from the firm-level wage ( $w_{it}$ ) divided by province-level average wage for each year ( $w_t^p$ ):

$$\tilde{N}_{it} = L_{it} \times \left( 100 \times \frac{w_{it}}{w_t^p} \right). \quad (7)$$

The second and third panels of Table A.4 report the robustness checks for the measurement of labor. The estimation results are similar to our baseline results in the first panel of Table A.4. On average the elasticity of substitution between labor and capital is 1.545 with the unadjusted head-count number of employee (Table A.4 Panel 2) and 1.498 with the human-capital adjusted labor developed from equation (7) (Table A.4 Panel 3).

### Large SOEs

As shown in the paper, large SOEs behave differently because they have preferential access to capital and are more capital intensive. To check whether the high elasticity of substitution between labor and capital is caused from large SOEs, we exclude SOEs that held SOE status throughout the period (the SOE continuers), which are largest firms in the sample. The results suggest that the estimates of capital-labor elasticity of substitution are not sensitive to exclusion of the large SOEs-the SOE continuers (Table A.4 Panel 4).

### Constant Returns and Cobb-Douglas Weight on Factors and Intermediates

In order to obtain to obtain sharp theoretical predictions using a flexible production function, we assume that there constant returns to scale in production and Cobb-Douglas weight (unitary substitution elasticity) between factors and intermediate inputs. In what follows we provide empirical validation for these two assumptions.

First, we relax the assumption of constant returns to scale by introducing  $\alpha_s^*$  in the following equation:

$$Q_{it} = \omega_{it} \left[ a_s (N_{it})^{\frac{\sigma_s - 1}{\sigma_s}} + (1 - a_s) (K_{it})^{\frac{\sigma_s - 1}{\sigma_s}} \right]^{\frac{\alpha_s \sigma_s}{\sigma_s - 1}} (M_{it})^{\alpha_s^*}. \quad (8)$$

In Table A.4 Panel 5, we report the results when we relax the assumption of constant returns to scale by using the independent weight on intermediate input ( $\bar{\alpha}_s^*$  where  $\bar{\alpha}_s + \bar{\alpha}_s^*$  may not sum to unity). Relaxing the assumption of constant returns to scale implies that that our value of moment ( $m_s(\Omega)$ ), becomes smaller than the baseline estimates (that assumes constant returns to scale) for 82.3% of the sectors. And, the estimated returns to scale are less than one for 72.1% of the industries, and the average value is 0.982, which is a small departure from constant returns to scale. The small difference constant and decreasing returns is consistent with the discussion in Gorodnichenko (2007) where a firm-specific market price index is not available and firms face imperfect competition. We will have an additional robustness check in the following section.

Finally, we provide validation for the assumption of a Cobb-Douglas weight between the factors and intermediate inputs. Our measure of intermediate inputs is the aggregate of all intermediate expenditures, which includes materials, parts and components, electricity, and services. Therefore, we are unable to assume, for example, that capital and electricity usages are complements, and labor and business services are substitutes due to outsourcing. Nonetheless, we introduce the following double CES form for a robustness check:

$$Q_{it} = \omega_{it} \left\{ a_s^* \left[ a_s (N_{it})^{\frac{\sigma_s - 1}{\sigma_s}} + (1 - a_s) (K_{it})^{\frac{\sigma_s - 1}{\sigma_s}} \right]^{\frac{\sigma_s}{\sigma_s - 1} \cdot \frac{\sigma_s^* - 1}{\sigma_s^*}} + (1 - a_s^*) (M_{it})^{\frac{\sigma_s^* - 1}{\sigma_s^*}} \right\}^{\frac{\sigma_s^*}{\sigma_s^* - 1}} \quad (9)$$

where the elasticity of substitution between the factor inputs,  $a_s (N_{it})^{\frac{\sigma_s - 1}{\sigma_s}} + (1 - a_s) (K_{it})^{\frac{\sigma_s - 1}{\sigma_s}}$ , and intermediate inputs is  $\sigma_s^*$ , and the weight on factor inputs is  $a_s^*$ .



Since all the inputs are non-linear in production process, we use the following moment condition:

$$m_s^*(\Omega) \equiv E \left[ \zeta_{it}(\Omega) \begin{pmatrix} \ln(K_{it}) \\ \ln(N_{i,t-1}) \\ \ln(M_{i,t-1}) \\ [\ln(K_{it})]^2 \\ [\ln(N_{i,t-1})]^2 \\ [\ln(M_{i,t-1})]^2 \\ \ln(K_{it}) \ln(N_{i,t-1}) \\ \ln(K_{it}) \ln(M_{i,t-1}) \\ \ln(N_{i,t-1}) \ln(M_{i,t-1}) \end{pmatrix} \right] = 0 \quad (10)$$

and search for the optimal combination of  $\hat{a}_s$ ,  $\hat{\sigma}_s$ ,  $\hat{a}_s^*$  and  $\hat{\sigma}_s^*$  by minimizing the sum of the moments using the weighting procedure proposed by Hansen (1982) for the plausible values of  $\Omega$ . Here, we use equation (5) to obtain the approximate values of  $\tilde{\Omega} = (\tilde{\alpha}_s, \tilde{\sigma}_s, \tilde{a}_s)$ . Note that  $\tilde{a}_s^*$  is approximated from  $\tilde{\alpha}_s$  since  $\tilde{a}_s^*$  equals to  $\tilde{\alpha}_s$  under the Cobb-Douglas assumption between factors and intermediate inputs.

Table A.4 Panel 6 shows that the average value of the estimated value of  $\hat{\sigma}_s^*$  is 1.022, and  $\hat{\sigma}_s^*$  is greater than unity for 55.1% of the industries. In this panel, we find that the obtained value of  $m_s^*(\Omega)$  from equation (10) is much larger than that of  $m_s(\Omega)$  from the baseline specification: the average value of  $m_s(\Omega)$  is 0.00065 and that of  $m_s^*(\Omega)$  is 0.00101; and  $m_s(\Omega)$  is smaller than  $m_s^*(\Omega)$  for 96.3% of the industries. Our results indicate that allowing the elasticity of substitution between factors and intermediate inputs to depart from unity does not necessarily improve the results, and this is strong empirical validation for the Cobb-Douglas weight. As shown in Table A.1, the share of spending on intermediate inputs in revenue is relatively stable over the period, which is also suggesting the unitary elasticity of substitution. This constant materials share contrasts with the declining share of paid to labor over the same period.

## Appendix 4: Constant Returns and Competitive Factor Markets

We use Proposition 1 in Gorodnichenko (2007) and verify two critical assumptions underlying our theory: constant returns to scale in production and competitive factor markets. Note that in this section we do not use the baseline CES production function, but use the simplest form (i.e., Cobb-Douglas) and validate our empirical estimates using an alternative method. Gorodnichenko (2007) obtains the following equation under the assumptions that firms minimize costs, factor and intermediate inputs are flexible, and cost is separable in each input:

$$\frac{\gamma}{\mu} = (1 - s_\pi)\rho \quad (11)$$

where  $\gamma$  is returns to scale in production,  $\mu$  is markups,  $s_\pi$  is profit shares in revenues, and  $\rho = \sum_{j=1}^n \rho_j s_j$  where  $\rho_j$  is the elasticity of cost with respect to input  $j$  and  $s_j$  is the cost share of input  $j$ . Moreover, if we add an assumption that firms maximize profits, we also have:

$$\eta = \frac{\gamma}{\mu} \quad (12)$$

where  $\eta$  is returns to scale in the revenue production function.

To show that our assumption of constant returns to scale production function is consistent with our markup measures, we first obtain returns to scale in revenue function by regressing the log of nominal revenue ( $r_{it}$ ) with the logs of three real inputs ( $n_{it}$ ,  $k_{it}$ , and  $m_{it}$ ) as well as firm- and year-fixed effects:

$$d(r_{it}) = \beta^n d(n_{it}) + \beta^k d(k_{it}) + \beta^m d(m_{it}) + \sum_t \theta^t D_{it}^t + \varepsilon_{it}. \quad (13)$$

The obtained returns to scale in revenue is  $\eta = 0.921$  ( $\beta^n = 0.094$ ;  $\beta^k = 0.04$ ;  $\beta^m = 0.787$ ). Since the median and mean values of the estimated markups are both  $\mu = 1.11$ , equation (12) implies that the expected returns to scale in production is  $\gamma = 1.02$ , and this validates our assumption of constant returns to scale in the production function.

Next, we validate the assumption of perfectly competitive factor markets using equation (11). Since the estimated returns to scale in revenue is 0.921 and the empirical aggregate value of profit

shares in revenue is around 4% in private and foreign firms,<sup>7</sup> we expect that  $\rho = 0.97$ . Thus, equation (11) validates the assumption that input markets are perfectly competitive, excluding the possibility such as labor market monopsony that results in an upward-sloping labor supply curve.

Finally, we estimate the elasticity of input cost with respect to each input and verify if  $\rho = \sum_{j=1}^n \rho_j s_j$  holds. We can obtain, for example, the elasticity of labor cost with respect to labor from the following equation:

$$\rho_N = \frac{d \ln [C(w_{it}, N_{it})]}{d \ln (N_{it})} \quad (14)$$

where  $C(w_{it}, N_{it})$  is the cost function of labor, which is labor compensation in the data.

We can obtain  $\rho_N$  by regressing  $\ln [C(w_{it}, N_{it})]$  with  $\ln(N_{it})$  and find that the estimated elasticity for labor across three types of labor are right around 1. The results suggest another validation for perfectly competitive labor market. Not surprisingly, we obtain the similar results of the elasticity of unity for intermediate input. Although we do not have a direct measure of capital payments, if we use the sum of interest paid and capital depreciation, we obtain that the elasticity is around 0.9. Overall, the expected value ( $\rho = 0.97$ ) from equation (11) is consistent with the sum of the elasticity of cost with respect to inputs ( $\sum_{j=1}^n \rho_j s_j = 0.98$ ) estimated from equation (14).

## Appendix 5: Capital Intensity

In this section, the change in capital intensity at the aggregate level is decomposed into its between and within effects. The equation used for this decomposition exercise is

$$\Delta CI = \sum \Delta S_i A CI_i + \sum \Delta CI_i A S_i. \quad (15)$$

In equation (15), the change in capital intensity during 1998 to 2007 (i.e., 0.421 from 0.876 in 1998 to 1.297 in 2007; see the second panel in Table A.1) is  $\Delta CI = CI_{2007} - CI_{1998}$  where  $CI_{1998}$  and  $CI_{2007}$  are capital intensities from the balanced sample in manufacturing in 1998 and 2007. We also define the following four variables: (1) the change in capital intensity of firm  $i$  is  $\Delta CI_i = CI_{i,2007} - CI_{i,1998}$  where  $CI_{i,1998}$  and  $CI_{i,2007}$  are capital intensities for firm  $i$  in 1998 and 2007, (2) the change in the share in employment for firm  $i$  is  $\Delta S_i = S_{i,2007} - S_{i,1998}$  where

---

<sup>7</sup>We have argued throughout the main paper that profit maximization was not the sole objective of SOEs.

$S_{i,1998}$  and  $S_{i,2007}$  are the shares of firm  $i$  in employment in 1998 and 2007, (3) the average capital intensity for firm  $i$  at 1998 and 2007 is  $ACI_i = 0.5(CI_{i,1998} + CI_{i,2007})$ , and (4) firm  $i$ 's average share in employment is  $AS_i = 0.5(S_{i,1998} + S_{i,2007})$ . In equation (15), the first term in the right-hand side is the between effect, which captures the change associated with the share of each firm in employment. The second term is the within effect because it measures the change in capital intensity within each firm  $i$ .

We find that almost all the increase in capital intensity at the aggregate level (0.421) stems from the within effect (0.458), and the between effect does not contribute to the increase in capital intensity (-0.037). Our results indicate that the composition change in firms, as well as the composition changes in industries and ownerships, is not responsible for the increase in aggregate capital intensity in Chinese manufacturing during the period of 1998-2007.

## References

- [1] Akerberg, Daniel A., Kevin Caves, and Garth Frazer, "Identification Properties of Recent Production Function Estimators," *Econometrica* 83 (2015), 2411-2451.
- [2] Brandt, Loren, and Thomas G. Rawski (Eds.), *China's Great Economic Transformation* (Cambridge, UK: Cambridge University Press, 2008).
- [3] L. Brandt, J. Van Biesebroeck, and Y. Zhang, "Creative Accounting or Creative Destruction? Firm-Level Productivity Growth in Chinese Manufacturing." *Journal of Development Economics*, 97, 339-351, 2012.
- [4] Cheng, Wenya, John Morrow, and Kitjawat Tacharoen, "Productivity As If Space Mattered: An Application to Factor Markets Across China," mimeograph (2013).
- [5] Chirinko, Robert S., Steven M. Fazzari, and Andrew P. Meyer, "A New Approach to Estimating Production Function Parameters: The Elusive Capital-Labor Substitution Elasticity," *Journal of Business and Economics Statistics* 29 (2011), 587-594.
- [6] De Loecker, Jan, and Frederic Warzynski, "Markups and Firm-Level Export Status," *American Economic Review* 102 (2012), 2437-2471.

- [7] Feenstra, Robert C., Robert Inklaar, and Marcel P. Timmer, "The Next Generation of the Penn World Table," *American Economic Review* 105 (2015), 3150-3182.
- [8] Gorodnichenko, Yuriy, "Using Firm Optimization to Evaluate and Estimate Returns to Scale," NBER working paper no. 13666 (2007).
- [9] Henningsen, Arne, and Géraldine Henningsen, "On estimation of the CES production function - Revisited." *Economics Letters* 115 (2012), 67-69.
- [10] Hansen, Lars Peter, "Large Sample Properties of Generalized Method of Moments Estimators," *Econometrica* 50 (1982), 1029-1054.
- [11] Kmenta, Jan, "On Estimation of the CES Production Function," *International Economic Review* 8 (1967), 180-189.
- [12] Levinsohn, James, and Amil Petrin, "Estimating Production Functions Using Inputs to Control for Unobservables," *Review of Economic Studies* 70 (2003), 317-340.
- [13] Li, Xi, Xuewen Liu, and Yong Wang, "A Model of China's State Capitalism," mimeograph (2015).
- [14] Olley, G. Steven, and Ariel Pakes, "The Dynamics of Productivity in the Telecommunications Equipment Industry," *Econometrica* 64 (1996), 1263-97.
- [15] Tang, Heiwai, Fei Wang, and Zhi Wang, "The Domestic Segment of Global Supply Chains in China under State Capitalism," World Bank Policy Research working paper no. 6960 (2014).
- [16] Thursby, Jerry G., and C. A. Knox Lovell, "An Investigation of the Kmenta Approximation to the CES Function." *International Economic Review* 19 (1978), 363-377.

## Tables and Figures

Table A.1: Summary statistics for the entire and balanced data

### 1. Entire sample

|                                 | SOE    |        |        | private |         |         | foreign |        |        | total   |         |        |
|---------------------------------|--------|--------|--------|---------|---------|---------|---------|--------|--------|---------|---------|--------|
|                                 | 1998   | 2007   | change | 1998    | 2007    | change  | 1998    | 2007   | change | 1998    | 2007    | change |
| The number of firms             | 35,793 | 11,787 | -67.1% | 17,868  | 190,580 | 966.6%  | 20,925  | 54,519 | 160.5% | 119,185 | 270,368 | 126.8% |
| Real output (billion RMB)       | 1,907  | 4,014  | 110.5% | 506     | 11,387  | 2149.2% | 1,351   | 8,552  | 532.8% | 5,090   | 25,159  | 394.3% |
| Employee (1,000)                | 21,538 | 7,988  | -62.9% | 3,912   | 29,119  | 644.3%  | 6,214   | 18,790 | 202.4% | 42,324  | 58,831  | 39.0%  |
| Real capital (billion RMB)      | 1,899  | 1,786  | -5.9%  | 190     | 2,595   | 1264.7% | 626     | 1,928  | 207.7% | 3,195   | 6,575   | 105.8% |
| Profits/value added (%)         | 2.8%   | 21.6%  | 18.8%  | 17.4%   | 19.6%   | 2.2%    | 13.9%   | 22.5%  | 8.7%   | 9.5%    | 20.9%   | 11.4%  |
| Wage bill/value added (%)       | 31.5%  | 17.4%  | -14.1% | 22.6%   | 15.9%   | -6.7%   | 23.3%   | 23.5%  | 0.2%   | 26.4%   | 18.4%   | -7.9%  |
| Intermediate inputs/revenue (%) | 75.5%  | 75.5%  | 0.0%   | 77.4%   | 75.3%   | -2.1%   | 77.8%   | 77.1%  | -0.7%  | 76.9%   | 75.9%   | -1.0%  |
| Share of unprofitable firms (%) | 42.7%  | 21.7%  | -21.0% | 15.5%   | 9.5%    | -6.0%   | 31.7%   | 20.3%  | -11.4% | 27.2%   | 12.4%   | -14.8% |
| Real wage rate (RMB)            | 8,136  | 26,671 | 227.8% | 7,563   | 17,880  | 136.4%  | 12,727  | 27,230 | 114.0% | 8,469   | 22,177  | 161.9% |
| Capital intensity               | 0.892  | 2.029  | 127.4% | 0.483   | 0.813   | 68.4%   | 0.987   | 0.920  | -6.7%  | 0.754   | 1.013   | 34.3%  |

### 2. Balanced sample

|                                 | SOE   |        |        | private |        |         | foreign |        |        | total  |        |        |
|---------------------------------|-------|--------|--------|---------|--------|---------|---------|--------|--------|--------|--------|--------|
|                                 | 1998  | 2007   | change | 1998    | 2007   | change  | 1998    | 2007   | change | 1998   | 2007   | change |
| The number of firms             | 5,989 | 3,537  | -40.9% | 5,684   | 14,391 | 153.2%  | 6,910   | 7,292  | 5.5%   | 28,360 | 28,360 | 0.0%   |
| Real output (billion RMB)       | 827   | 2,162  | 161.4% | 212     | 2,651  | 1149.2% | 636     | 2,241  | 252.2% | 2,101  | 7,635  | 263.5% |
| Employee (1,000)                | 8,257 | 4,231  | -48.8% | 1,506   | 5,830  | 287.0%  | 2,727   | 4,454  | 63.3%  | 15,659 | 15,688 | 0.2%   |
| Real capital (billion RMB)      | 839   | 944    | 12.5%  | 76      | 643    | 749.4%  | 306     | 518    | 69.2%  | 1,375  | 2,237  | 62.8%  |
| Profits/value added (%)         | 8.8%  | 23.6%  | 14.8%  | 19.1%   | 21.9%  | 2.8%    | 18.1%   | 23.9%  | 5.8%   | 13.8%  | 23.0%  | 9.2%   |
| Wage bill/value added (%)       | 31.0% | 17.6%  | -13.4% | 21.5%   | 15.2%  | -6.3%   | 22.9%   | 22.8%  | -0.1%  | 26.3%  | 18.1%  | -8.2%  |
| Intermediate inputs/revenue (%) | 74.5% | 74.1%  | -0.4%  | 77.6%   | 76.5%  | -1.1%   | 77.4%   | 76.3%  | -1.1%  | 76.4%  | 75.7%  | -0.6%  |
| Share of unprofitable firms (%) | 26.2% | 22.0%  | -4.3%  | 11.1%   | 12.0%  | 0.8%    | 26.8%   | 19.2%  | -7.5%  | 19.3%  | 15.6%  | -3.7%  |
| Real wage rate (RMB)            | 9,505 | 28,599 | 200.9% | 7,822   | 19,039 | 143.4%  | 13,837  | 30,561 | 120.9% | 9,737  | 25,301 | 159.8% |
| Capital intensity               | 1.027 | 2.023  | 96.9%  | 0.497   | 1.015  | 104.1%  | 1.096   | 1.043  | -4.9%  | 0.876  | 1.297  | 48.1%  |

*Notes:* (1) The ratios are calculated from the aggregates by ownership. For example, profits/value added for SOE in 1998 is profits from all SOEs divided by value added from all SOEs. (2) The industry-level output deflator (1998 prices) is used to deflate gross output and wage rate. (3) The column denoted "change" reports a percentage-point change from 1998 to 2007 for the variables with (%). The same column reports a percentage change from 1998 to 2007 for the other variables. (4) Capital intensity is real capital divided by augmented labor (See online appendices 1 and 3).

Table A.2: Summary statistics for SOEs

## 1. Entire sample

|                                 | Top central SOEs |        |        | Other SOEs |        |        | All SOEs |        |        |
|---------------------------------|------------------|--------|--------|------------|--------|--------|----------|--------|--------|
|                                 | 1998             | 2007   | change | 1998       | 2007   | change | 1998     | 2007   | change |
| The number of firms             | 120              | 230    | 91.7%  | 35,673     | 11,557 | -67.6% | 35,793   | 11,787 | -67.1% |
| Real output (billion RMB)       | 370              | 1,053  | 184.9% | 1,538      | 2,961  | 92.3%  | 1,907    | 4,014  | 110.5% |
| Employee (1,000)                | 1,819            | 1,428  | -21.5% | 19,719     | 6,560  | -66.5% | 21,538   | 7,988  | -62.9% |
| Real capital (billion RMB)      | 387              | 476    | 22.9%  | 1,512      | 1,311  | -13.6% | 1,899    | 1,786  | -5.9%  |
| Profits/value added (%)         | 6.0%             | 21.7%  | 15.7%  | 1.9%       | 21.6%  | 19.8%  | 2.8%     | 21.6%  | 18.8%  |
| Wage bill/value added (%)       | 18.6%            | 14.4%  | -4.2%  | 35.3%      | 18.7%  | -16.6% | 31.5%    | 17.4%  | -14.1% |
| Intermediate inputs/revenue (%) | 71.4%            | 73.0%  | 1.6%   | 76.4%      | 76.4%  | 0.0%   | 75.5%    | 75.5%  | 0.0%   |
| Share of unprofitable firms (%) | 20.8%            | 12.2%  | -8.7%  | 42.8%      | 21.9%  | -20.8% | 42.7%    | 21.7%  | -21.0% |
| Real wage rate (RMB)            | 13,000           | 37,200 | 186.1% | 7,687      | 24,378 | 214.9% | 8,136    | 26,671 | 227.8% |
| Capital intensity               | 2.197            | 3.009  | 37.0%  | 0.775      | 1.814  | 157.9% | 0.892    | 2.029  | 127.4% |

## 2. Balanced sample

|                                 | Top central SOEs |        |        | Other SOEs |        |        | All SOEs |        |        |
|---------------------------------|------------------|--------|--------|------------|--------|--------|----------|--------|--------|
|                                 | 1998             | 2007   | change | 1998       | 2007   | change | 1998     | 2007   | change |
| The number of firms             | 66               | 124    | 87.9%  | 5,923      | 3,413  | -42.4% | 5,989    | 3,537  | -40.9% |
| Real output (billion RMB)       | 184              | 590    | 219.9% | 643        | 1,572  | 144.7% | 827      | 2,162  | 161.4% |
| Employee (1,000)                | 1,137            | 858    | -24.5% | 7,119      | 3,373  | -52.5% | 8,257    | 4,231  | -48.8% |
| Real capital (billion RMB)      | 178              | 241    | 35.3%  | 661        | 703    | 6.3%   | 839      | 944    | 12.5%  |
| Profits/value added (%)         | 11.4%            | 26.9%  | 15.5%  | 7.9%       | 21.9%  | 14.1%  | 8.8%     | 23.6%  | 14.8%  |
| Wage bill/value added (%)       | 19.5%            | 14.5%  | -5.0%  | 35.2%      | 19.2%  | -16.0% | 31.0%    | 17.6%  | -13.4% |
| Intermediate inputs/revenue (%) | 69.2%            | 67.6%  | -1.6%  | 76.0%      | 76.6%  | 0.6%   | 74.5%    | 74.1%  | -0.4%  |
| Share of unprofitable firms (%) | 22.7%            | 5.6%   | -17.1% | 26.3%      | 22.6%  | -3.7%  | 26.2%    | 22.0%  | -4.3%  |
| Real wage rate (RMB)            | 11,582           | 40,268 | 247.7% | 9,173      | 25,630 | 178.4% | 9,505    | 28,599 | 200.9% |
| Capital intensity               | 1.622            | 2.521  | 55.4%  | 0.935      | 1.894  | 123.5% | 1.027    | 2.023  | 96.9%  |

Notes: See Table A.1.

Table A.3: Robustness checks for the CES production function estimates

1. Translog with Kmenta (1967)

1.1 2-digit sectors ( $\sigma_s > 1$  for 92.9% of the 2-digit sectors)

|                                                 | Estimated parameters |        |        |       | 5% significant |
|-------------------------------------------------|----------------------|--------|--------|-------|----------------|
|                                                 | Mean                 | St.dev | Min    | Max   |                |
| $\sigma_s$ (implied elasticity of substitution) | 1.229                | 0.165  | 0.828  | 1.685 | -              |
| ln(labor)                                       | 0.105                | 0.025  | 0.067  | 0.167 | 100.0%         |
| ln(capital)                                     | 0.079                | 0.021  | 0.029  | 0.120 | 100.0%         |
| ln(labor)ln(capital)                            | -0.007               | 0.005  | -0.012 | 0.011 | 85.7%          |

1.2 3-digit sectors ( $\sigma_s > 1$  for 81.2% of the 3-digit sectors)

|                                                 | Estimated parameters |        |        |       | 5% significant |
|-------------------------------------------------|----------------------|--------|--------|-------|----------------|
|                                                 | Mean                 | St.dev | Min    | Max   |                |
| $\sigma_s$ (implied elasticity of substitution) | 1.246                | 0.323  | 0.358  | 2.404 | -              |
| ln(labor)                                       | 0.104                | 0.037  | 0.035  | 0.253 | 100.0%         |
| ln(capital)                                     | 0.078                | 0.027  | -0.015 | 0.154 | 97.7%          |
| ln(labor)ln(capital)                            | -0.005               | 0.012  | -0.025 | 0.093 | 42.1%          |

2. NLS with fixed effects

2.1 2-digit sectors ( $\sigma_s > 1$  for 96.3% of the 2-digit sectors)

|                                         | Estimated parameters |        |       |       | 5% significant |
|-----------------------------------------|----------------------|--------|-------|-------|----------------|
|                                         | Mean                 | St.dev | Min   | Max   |                |
| $\sigma_s$ (elasticity of substitution) | 1.547                | 0.216  | 0.932 | 1.954 | 92.6%          |
| $\alpha_s$ (weight on factor inputs)    | 0.177                | 0.033  | 0.126 | 0.251 | 100.0%         |
| $a_s$ (weight on labor)                 | 0.534                | 0.083  | 0.404 | 0.816 | 100.0%         |

2.2 3-digit sectors ( $\sigma_s > 1$  for 95.0% of the 3-digit sectors)

|                                         | Estimated parameters |        |       |       | 5% significant |
|-----------------------------------------|----------------------|--------|-------|-------|----------------|
|                                         | Mean                 | St.dev | Min   | Max   |                |
| $\sigma_s$ (elasticity of substitution) | 1.529                | 0.398  | 0.389 | 2.490 | 71.7%          |
| $\alpha_s$ (weight on factor inputs)    | 0.179                | 0.045  | 0.085 | 0.310 | 100.0%         |
| $a_s$ (weight on labor)                 | 0.551                | 0.117  | 0.305 | 1.065 | 100.0%         |



Table A.4: Robustness checks for GMM estimates for 136 3-digit sectors

| 1. Baseline specification ( $\sigma_s > 1$ for 95.6%)               |         |         |         |         |
|---------------------------------------------------------------------|---------|---------|---------|---------|
|                                                                     | Mean    | St.dev  | Min     | Max     |
| Parameters                                                          |         |         |         |         |
| $\sigma_s$ (elasticity of substitution)                             | 1.553   | 0.366   | 0.624   | 2.436   |
| $\alpha_s$ (weight on factor inputs)                                | 0.169   | 0.059   | 0.060   | 0.343   |
| $a_s$ (weight on labor)                                             | 0.548   | 0.108   | 0.261   | 0.900   |
| $m_s$ (minimum value of $m_s(\Omega)$ )                             | 6.5E-04 | 1.4E-03 | 1.0E-06 | 1.0E-02 |
| 2. Unadjusted employee ( $\sigma_s > 1$ for 94.9%)                  |         |         |         |         |
|                                                                     | Mean    | St.dev  | Min     | Max     |
| Parameters                                                          |         |         |         |         |
| $\sigma_s$ (elasticity of substitution)                             | 1.545   | 0.379   | 0.624   | 2.436   |
| $\alpha_s$ (weight on factor inputs)                                | 0.168   | 0.058   | 0.060   | 0.343   |
| $a_s$ (weight on labor)                                             | 0.548   | 0.109   | 0.261   | 0.900   |
| $m_s$ (minimum value of $m_s(\Omega)$ )                             | 6.6E-04 | 1.4E-03 | 5.4E-07 | 1.1E-02 |
| 3. Alternative human-capital adjustment ( $\sigma_s > 1$ for 94.1%) |         |         |         |         |
|                                                                     | Mean    | St.dev  | Min     | Max     |
| Parameters                                                          |         |         |         |         |
| $\sigma_s$ (elasticity of substitution)                             | 1.498   | 0.343   | 0.624   | 2.371   |
| $\alpha_s$ (weight on factor inputs)                                | 0.155   | 0.056   | 0.040   | 0.313   |
| $a_s$ (weight on labor)                                             | 0.558   | 0.110   | 0.261   | 0.835   |
| $m_s$ (minimum value of $m_s(\Omega)$ )                             | 1.0E-03 | 1.9E-03 | 9.6E-06 | 1.7E-02 |
| 4. Without SOE continuers ( $\sigma_s > 1$ for 94.9%)               |         |         |         |         |
|                                                                     | Mean    | St.dev  | Min     | Max     |
| Parameters                                                          |         |         |         |         |
| $\sigma_s$ (elasticity of substitution)                             | 1.539   | 0.356   | 0.624   | 2.436   |
| $\alpha_s$ (weight on factor inputs)                                | 0.168   | 0.061   | 0.060   | 0.343   |
| $a_s$ (weight on labor)                                             | 0.550   | 0.108   | 0.261   | 0.900   |
| $m_s$ (minimum value of $m_s(\Omega)$ )                             | 6.6E-04 | 1.4E-03 | 2.5E-06 | 1.2E-02 |

5. Without the CRS Restriction ( $\sigma_s > 1$  for 94.9%)

|                                              | Mean    | St.dev  | Min     | Max     |
|----------------------------------------------|---------|---------|---------|---------|
| Parameters                                   |         |         |         |         |
| $\sigma_s$ (elasticity of substitution)      | 1.533   | 0.356   | 0.624   | 2.296   |
| $\alpha_s$ (weight on factor inputs)         | 0.172   | 0.052   | 0.060   | 0.345   |
| $\alpha_s^*$ (weight on intermediate inputs) | 0.547   | 0.123   | 0.256   | 0.865   |
| $a_s$ (weight on labor)                      | 0.810   | 0.053   | 0.672   | 0.945   |
| $m_s$ (minimum value of $m_s(\Omega)$ )      | 1.2E-04 | 3.8E-04 | 1.0E-06 | 4.2E-03 |
| Implied returns to scale                     | 0.982   | 0.037   | 0.900   | 1.080   |

6. Without the Cobb-Douglas Restriction ( $\sigma_s > 1$  for 96.3%)

|                                                                | Mean    | St.dev  | Min     | Max     |
|----------------------------------------------------------------|---------|---------|---------|---------|
| Parameters                                                     |         |         |         |         |
| $\sigma_s$ (substitution between capital and labor)            | 1.530   | 0.346   | 0.624   | 2.378   |
| $a_s$ (weight on labor)                                        | 0.542   | 0.107   | 0.256   | 0.895   |
| $\sigma_s^*$ (substitution between factor/intermediate inputs) | 1.022   | 0.082   | 0.917   | 1.099   |
| $a_s^*$ (weight on factor input)                               | 0.178   | 0.056   | 0.060   | 0.338   |
| $m_s^*$ (minimum value of $m_s(\Omega)$ )                      | 1.0E-03 | 2.0E-03 | 1.7E-06 | 1.5E-02 |
